# Supplementary material for: Thermochemical electronegativities of the elements
Source: PubMed Central journal article supplement (PMC8027013; doi:10.1038/s41467-021-22429-0), 2021-04-07

# Supplementary Information

## Thermochemical Electronegativities of the Elements

Christian Tantardini<sup>\*1,2</sup>, Artem R. Oganov<sup>\*1</sup>

<sup>1</sup>*Skolkovo Institute of Science and Technology, Skolkovo Innovation Center 121025, 3 Nobel Street, Moscow, Russia*

<sup>2</sup>*Institute of Solid State Chemistry and Mechanochemistry SB RAS, 630128 Novosibirsk, Russian Federation.*

*\*corresponding authors: [christiantantardini@ymail.com](mailto:christiantantardini@ymail.com), [A.Oganov@skoltech.ru](mailto:A.Oganov@skoltech.ru)*

**Supplementary Figure 1.** Standard Pauling electronegativities (x-axis, in  $\text{eV}^{-1/2}$ ) compared with Pauling electronegativities (y-axis, in  $\text{eV}^{-1/2}$ ) calculated using experimental bond energies for alkali and alkali earth metals. One can see very large difference.

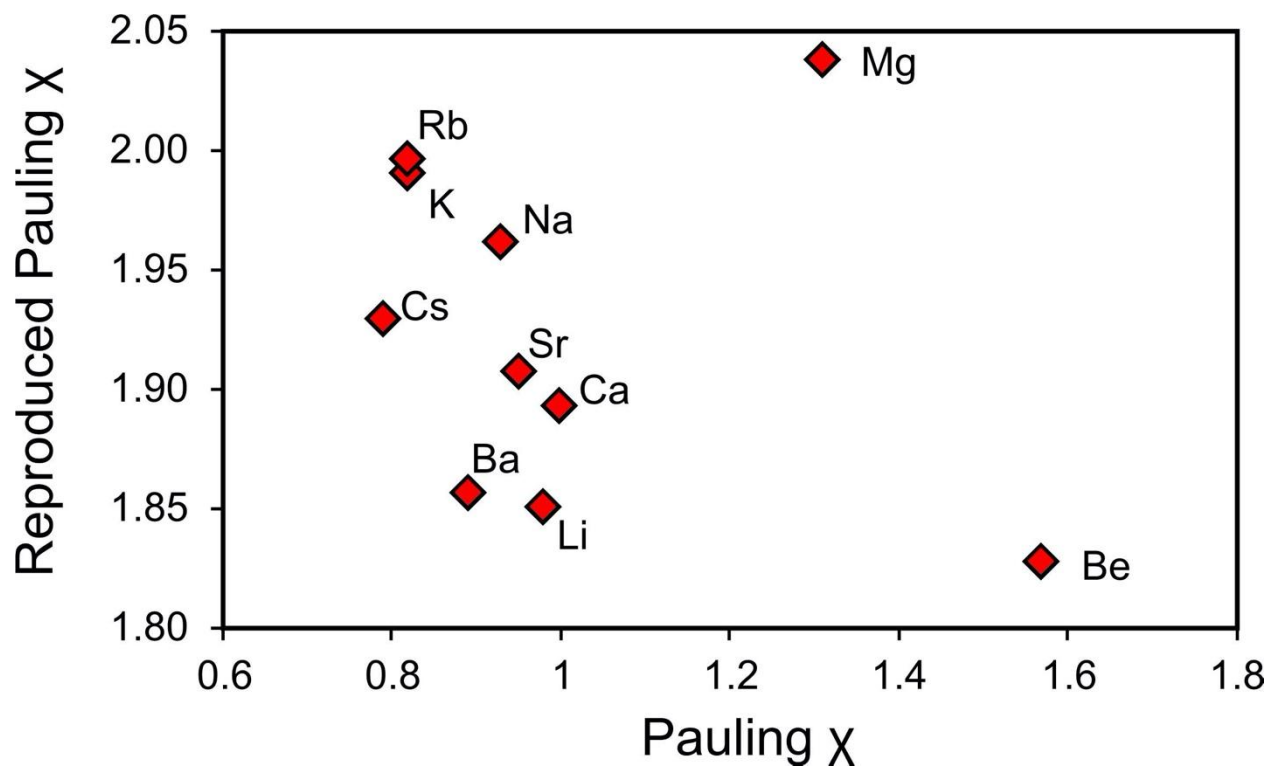

**Supplementary Table 2. Experimental bond dissociation energies used for calculating electronegativities.**

| Homonuclear bonds                          | Dissociation Enthalpy / (eV) | Heteronuclear bonds | Dissociation Enthalpy / (eV) |
|--------------------------------------------|------------------------------|---------------------|------------------------------|
| H <sub>2</sub>                             | 4.517                        | HF                  | 5.904                        |
| Li <sub>2</sub>                            | 1.116                        | LiF                 | 6.001                        |
| Be <sub>2</sub>                            | 2.156                        | BeF                 | 6.622                        |
| B <sub>2</sub>                             | 4.353                        | F <sub>2</sub> B-F  | 5.773                        |
| C <sub>2</sub> H <sub>6</sub> (C-C)        | 3.911                        | H <sub>3</sub> C-F  | 4.770                        |
| N <sub>2</sub> H <sub>4</sub> (N-N)        | 2.871                        | H <sub>2</sub> N-H  | 4.665                        |
| H <sub>2</sub> O <sub>2</sub> (O-O)        | 2.183                        | H-OH                | 5.152                        |
| F <sub>2</sub>                             | 1.644                        |                     |                              |
| Na <sub>2</sub>                            | 0.796                        | NaF                 | 5.379                        |
| Mg <sub>2</sub>                            | 1.337                        | MgF                 | 5.343                        |
| Al <sub>2</sub>                            | 2.739                        | AlF                 | 6.996                        |
| H <sub>3</sub> Si-SiH <sub>3</sub> (Si-Si) | 3.327                        | SiF                 | 5.974                        |
| H <sub>2</sub> P-PH <sub>2</sub> (P-P)     | 2.654                        | H <sub>2</sub> P-H  | 3.638                        |
| FS-SF (S-S)                                | 3.755                        | SF                  | 3.560                        |
| Cl <sub>2</sub>                            | 2.514                        | HCl                 | 4.471                        |
| K <sub>2</sub>                             | 0.528                        | KF                  | 5.127                        |
| Ca <sub>2</sub>                            | 1.088                        | CaF                 | 5.807                        |
| Sc <sub>2</sub>                            | 1.689                        | ScF                 | 6.209                        |
| Ti <sub>2</sub>                            | 1.219                        | TiF                 | 5.897                        |
| V <sub>2</sub>                             | 0.961                        | VF                  | 6.115                        |
| Cr <sub>2</sub>                            | 0.742                        | CrF                 | 5.421                        |
| Mn <sub>2</sub>                            | 0.532                        | MnF                 | 4.614                        |
| Fe <sub>2</sub>                            | 0.778                        | FeF                 | 4.633                        |
| Co <sub>2</sub>                            | 0.740                        | CoF                 | 4.467                        |

|                 |       |     |       |
|-----------------|-------|-----|-------|
| Ni <sub>2</sub> | 0.741 | NiF | 4.557 |
| Cu <sub>2</sub> | 2.083 | CuF | 4.291 |
| Zn <sub>2</sub> | 0.230 | ZnF | 3.773 |
| Ga <sub>2</sub> | 1.197 | GaF | 4.941 |
| Ge <sub>2</sub> | 2.740 | GeF | 5.421 |
| As <sub>2</sub> | 3.999 | AsF | 4.249 |
| Se <sub>2</sub> | 1.769 | SeF | 3.513 |
| Br <sub>2</sub> | 2.056 | FBr | 2.637 |
| Rb <sub>2</sub> | 0.503 | RbF | 5.091 |
| Sr <sub>2</sub> | 0.871 | SrF | 5.638 |
| Y <sub>2</sub>  | 2.798 | YF  | 7.103 |
| Zr <sub>2</sub> | 1.052 | ZrF | 6.500 |
| Nb <sub>2</sub> | 1.349 | NbF | 4.480 |
| Mo <sub>2</sub> | 1.227 | MoF | 4.809 |
| Tc <sub>2</sub> | 0.050 | TcF | 2.020 |
| Ru <sub>2</sub> | 1.125 | RuF | 3.781 |
| Rh <sub>2</sub> | 0.963 | RhF | 3.686 |
| Pd <sub>2</sub> | 0.644 | PdF | 3.088 |
| Ag <sub>2</sub> | 1.631 | AgF | 3.699 |
| Cd <sub>2</sub> | 0.076 | CdF | 3.161 |
| In <sub>2</sub> | 1.036 | InF | 5.244 |
| Sn <sub>2</sub> | 1.939 | SnF | 4.933 |
| Sb <sub>2</sub> | 3.127 | SbF | 4.550 |
| Te <sub>2</sub> | 2.860 |     |       |
| I <sub>2</sub>  | 1.681 | FI  | 2.730 |
| Cs <sub>2</sub> | 0.433 | CsF | 5.327 |
| Ba <sub>2</sub> | 0.698 | BaF | 5.767 |

|     |       |      |       |
|-----|-------|------|-------|
| Hf2 | 1.070 | HfF  | 6.737 |
| Ta2 | 1.469 | TaF  | 5.939 |
| W2  | 1.594 | WF   | 5.638 |
| Re2 | 1.340 | ReF  | 4.458 |
| Os2 | 1.364 | OsF  | 3.955 |
| Ir2 | 1.149 | IrF  | 3.430 |
| Pt2 | 0.980 | PtF  | 2.684 |
| Au2 | 2.294 | AuCl | 3.555 |
| Hg2 | 0.084 | HgF  | 1.866 |
| Tl2 | 0.616 | TlF  | 4.550 |
| Pb2 | 0.898 | PbF  | 3.679 |
| Fr2 | 0.430 | FrF  | 5.160 |
| La2 | 2.520 | LaF  | 6.830 |
| Ce2 | 2.470 | CeF  | 6.032 |
| Pr2 | 1.310 | PrF  | 6.032 |
| Nd2 | 0.830 | NdF  | 5.651 |
| Sm2 | 0.520 | SmF  | 5.856 |
| Eu2 | 0.300 | EuF  | 5.638 |
| Gd2 | 1.780 | GdF  | 6.115 |
| Tb2 | 1.320 | TbF  | 5.814 |
| Dy2 | 0.690 | DyF  | 5.503 |
| Ho2 | 0.820 | HoF  | 5.597 |
| Er2 | 0.740 | ErF  | 5.856 |
| Tm2 | 0.520 | TmF  | 5.286 |
| Yb2 | 0.170 | YbF  | 5.365 |
| Lu2 | 1.430 | LuF  | 4.198 |
| Th2 | 2.995 | ThF  | 6.758 |

|    |       |      |       |
|----|-------|------|-------|
| U2 | 2.301 | UF   | 6.716 |
| -  | -     | LiCl | 4.710 |
| -  | -     | NaCl | 4.384 |
| -  | -     | KCl  | 4.405 |
| -  | -     | RbCl | 4.474 |
| -  | -     | CsCl | 4.619 |
| -  | -     | LiBr | 4.195 |
| -  | -     | NaBr | 3.900 |
| -  | -     | KBr  | 3.929 |
| -  | -     | RbBr | 3.946 |
| -  | -     | CsBr | 4.033 |
| -  | -     | LiI  | 3.534 |
| -  | -     | NaI  | 3.196 |
| -  | -     | KI   | 3.343 |
| -  | -     | RbI  | 3.304 |
| -  | -     | CsI  | 3.508 |

**Supplementary Table 3.** Electronegativities of the elements from different scales. For Martinov-Batsanov scale there are different electronegativity values for the different oxidation states (reported in brackets) of each element.

| Element | Pauling /<br>( $eV^{-1/2}$ ) | Mulliken /<br>( $eV$ ) | Allen /<br>( $eV$ ) | Martynov & Batsanov /<br>( $eV^{-1/2}$ ) | Our scale |
|---------|------------------------------|------------------------|---------------------|------------------------------------------|-----------|
| H       | 2.20                         | 7.18                   | 2.3                 | -                                        | 3.04      |
| Li      | 0.98                         | 3.00                   | 0.912               | 0.95                                     | 2.17      |
| Na      | 0.93                         | 2.84                   | 0.869               | 0.9                                      | 2.15      |
| K       | 0.82                         | 2.42                   | 0.734               | 0.8                                      | 2.07      |
| Rb      | 0.82                         | 2.33                   | 0.706               | 0.8                                      | 2.07      |
| Cs      | 0.79                         | 2.18                   | 0.659               | 0.75                                     | 1.97      |
| Fr      | 0.70                         | 2.21                   | 0.67                | 0.7                                      | 2.01      |
| Be      | 1.57                         | 4.41                   | 1.576               | 1.5                                      | 2.42      |
| Mg      | 1.31                         | 3.62                   | 1.293               | 1.2                                      | 2.39      |
| Ca      | 1.00                         | 3.07                   | 1.034               | 1                                        | 2.20      |
| Sr      | 0.95                         | 2.87                   | 0.963               | 1                                        | 2.13      |
| Ba      | 0.89                         | 2.68                   | 0.881               | 0.9                                      | 2.02      |
| Ra      | 0.90                         | 2.69                   | 0.89                | 0.9                                      | -         |
| Sc      | 1.36                         | 3.37                   | 1.19                | 1.3                                      | 2.35      |
| Ti      | 1.54                         | 3.45                   | 1.38                | 1.6                                      | 2.23      |
| V       | 1.63                         | 3.64                   | 1.53                | (II) 1.5 (III) 1.7 (V) 2.00              | 2.08      |
| Cr      | 1.66                         | 3.72                   | 1.65                | (II) 1.6 (III) 1.8 (V) 2.2               | 2.12      |
| Mn      | 1.55                         | 3.46                   | 1.75                | (II) 1.5 (III) 1.8 (IV) 2.0<br>(VII) 2.3 | 2.20      |
| Fe      | 1.83                         | 4.03                   | 1.8                 | (II) 1.8 (III) 1.9                       | 2.32      |
| Co      | 1.88                         | 4.27                   | 1.84                | (II) 1.8 (III) 2.0 (IV) 3.1              | 2.34      |
| Ni      | 1.91                         | 4.40                   | 1.88                | (II) 1.9 (III) 2.0 (IV) 3.4              | 2.32      |
| Cu      | 1.90                         | 4.48                   | 1.85                | (I) 1.8 (II) 2.1                         | 2.86      |
| Zn      | 1.65                         | 4.40                   | 1.59                | 1.6                                      | 2.26      |
| Y       | 1.22                         | 3.26                   | 1.12                | 1.25                                     | 2.52      |
| Zr      | 1.33                         | 3.53                   | 1.32                | 1.5                                      | 2.05      |
| Nb      | 1.60                         | 3.84                   | 1.41                | (III) 1.6 (V) 1.9                        | 2.59      |
| Mo      | 2.16                         | 3.92                   | 1.47                | (IV) 1.8 (VI) 2.2                        | 2.47      |
| Tc      | 1.90                         | 3.91                   | 1.51                | (IV) 1.9                                 | 2.82      |

|    |      |      |       |                             |      |
|----|------|------|-------|-----------------------------|------|
| Ru | 2.20 | 4.20 | 1.54  | (II) 2.0 (III) 2.0 (IV) 2.1 | 2.68 |
| Rh | 2.28 | 4.30 | 1.56  | (II) 2.1 (III) 2.1          | 2.65 |
| Pd | 2.20 | 4.45 | 1.58  | (II) 2.2 (III) 2.2 (IV) 2.3 | 2.70 |
| Ag | 1.93 | 4.44 | 1.87  | 1.9                         | 2.88 |
| Cd | 1.69 | 4.14 | 1.52  | 1.7                         | 2.36 |
| Hf | 1.30 | 3.50 | 1.16  | 1.4                         | 2.01 |
| Ta | 1.50 | 4.10 | 1.34  | (III) 1.5 (V) 1.8           | 2.32 |
| W  | 2.36 | 4.40 | 1.47  | (IV) 1.8 (V) 2.1            | 2.42 |
| Re | 1.90 | 3.97 | 1.6   | (IV) 1.9                    | 2.59 |
| Os | 2.20 | 4.89 | 1.65  | (II) 2.0 (III) 2.1 (IV) 2.2 | 2.72 |
| Ir | 2.20 | 5.34 | 1.68  | (II) 2.1 (III) 2.2          | 2.79 |
| Pt | 2.28 | 5.57 | 1.72  | (II) 2.3 (III) 2.3 (IV) 2.4 | 2.98 |
| Au | 2.54 | 5.77 | 1.92  | (I) 2.0 (III) 2.4           | 2.81 |
| Hg | 2.00 | 4.97 | 1.76  | 1.8                         | 2.92 |
| B  | 2.04 | 4.29 | 2.05  | 1.9                         | 3.04 |
| Al | 1.61 | 3.21 | 1.613 | 1.5                         | 2.52 |
| Ga | 1.81 | 3.21 | 1.756 | 1.7                         | 2.43 |
| In | 1.78 | 3.09 | 1.656 | 1.8                         | 2.29 |
| Tl | 1.62 | 3.24 | 1.789 | (I) 1.4 (III) 1.9           | 2.26 |
| C  | 2.55 | 6.26 | 2.544 | 2.5                         | 3.15 |
| Si | 1.90 | 4.77 | 1.916 | 1.9                         | 2.82 |
| Ge | 2.01 | 4.57 | 1.994 | 2.0                         | 2.79 |
| Sn | 1.96 | 4.23 | 1.824 | (II) 1.8 (IV) 2.0           | 2.68 |
| Pb | 2.33 | 3.89 | 1.854 | (II) 1.9 (IV) 2.1           | 2.62 |
| N  | 3.04 | 7.23 | 3.066 | 3.0                         | 3.56 |
| P  | 2.19 | 5.62 | 2.253 | 2.1                         | 3.16 |
| As | 2.18 | 5.31 | 2.211 | 2.0                         | 3.15 |
| Sb | 2.05 | 4.85 | 1.984 | (III) 1.9 (V) 2.2           | 3.05 |
| Bi | 2.02 | 4.11 | 2.01  | (III) 1.9 (V) 2.2           | -    |
| O  | 3.44 | 7.54 | 3.61  | 3.55                        | 3.78 |
| S  | 2.58 | 6.22 | 2.589 | 2.5                         | 3.44 |
| Se | 2.55 | 5.89 | 2.424 | 2.4                         | 3.37 |



|    |      |       |       |                           |      |
|----|------|-------|-------|---------------------------|------|
| Te | 2.10 | 5.49  | 2.158 | 2.1                       | 3.14 |
| Po | 2.00 | 4.91  | 2.19  | 2.0                       | -    |
| F  | 3.98 | 10.41 | 4.193 | 4.0                       | 4.00 |
| Cl | 3.16 | 8.29  | 2.869 | 3.0                       | 3.56 |
| Br | 2.96 | 7.59  | 2.685 | 2.8                       | 3.45 |
| I  | 2.66 | 6.76  | 2.359 | 2.5                       | 3.20 |
| At | 2.20 | 5.87  | 2.39  | 2.2                       | -    |
| La | 1.10 | 3.06  | -     | 1.2                       | 2.49 |
| Ce | 1.12 | 3.05  | -     | -                         | 2.61 |
| Pr | 1.13 | 3.21  | -     | -                         | 2.24 |
| Nd | 1.14 | 3.72  | -     | -                         | 2.11 |
| Pm | 1.13 | 2.86  | -     | -                         | -    |
| Sm | 1.17 | 2.90  | -     | -                         | 1.90 |
| Eu | 1.20 | 2.89  | -     | -                         | 1.81 |
| Gd | 1.20 | 3.14  | -     | -                         | 2.40 |
| Tb | 1.10 | 3.51  | -     | -                         | 2.29 |
| Dy | 1.22 | 3.15  | -     | -                         | 2.07 |
| Ho | 1.23 | 3.18  | -     | -                         | 2.12 |
| Er | 1.24 | 3.21  | -     | -                         | 2.02 |
| Tm | 1.25 | 3.61  | -     | -                         | 2.03 |
| Yb | 1.10 | 3.12  | -     | -                         | 1.78 |
| Lu | 1.27 | 2.89  | 1.09  | -                         | 2.68 |
| Th | 1.30 | 3.63  | -     | (IV) 1.3                  | 2.62 |
| U  | 1.38 | 3.36  | -     | (IV) 1.4 (V) 1.6 (VI) 1.8 | 2.45 |
| He | -    | 12.29 | 4.16  | -                         | -    |
| Ne | -    | 10.78 | 4.787 | -                         | -    |
| Ar | -    | 7.88  | 3.242 | -                         | -    |
| Kr | 3.23 | 7.00  | 2.966 | -                         | -    |
| Xe | 3.02 | 6.07  | 2.582 | -                         | -    |
| Rn | 2.81 | 5.37  | 2.6   | -                         | -    |

**Supplementary Table 4. Lattice parameters of the crystal structures used for Bader charge calculations.**

| System                          | Space Group  | $a / (\text{Å})$ | $b / (\text{Å})$ | $c / (\text{Å})$ | $\alpha$ | $\beta$ | $\gamma$ |
|---------------------------------|--------------|------------------|------------------|------------------|----------|---------|----------|
| Al <sub>2</sub> O <sub>3</sub>  | $R\bar{3}c$  | 4.803            | 4.803            | 13.110           | 90.00    | 90.00   | 120.00   |
| AlN                             | $P6_3mc$     | 3.127            | 3.127            | 5.013            | 90.00    | 90.00   | 120.00   |
| AuB <sub>2</sub>                | $P6/mmm$     | 3.005            | 3.005            | 4.281            | 90.00    | 90.00   | 120.00   |
| MoB                             | $I4_1/amd$   | 3.127            | 3.127            | 17.007           | 90.00    | 90.00   | 90.00    |
| WB                              | $I4_1/amd$   | 3.139            | 3.139            | 16.947           | 90.00    | 90.00   | 90.00    |
| Bi <sub>2</sub> Te <sub>3</sub> | $R\bar{3}m$  | 4.444            | 4.444            | 31.484           | 90.00    | 90.00   | 120.00   |
| LiH                             | $Fm\bar{3}m$ | 2.841            | 2.841            | 2.841            | 60.00    | 60.00   | 60.00    |
| PtH <sub>4</sub>                | $Im\bar{3}m$ | 6.711            | 6.711            | 6.711            | 90.00    | 90.00   | 90.00    |
| PbH                             | $P6_3mc$     | 3.514            | 3.514            | 7.369            | 90.00    | 90.00   | 120.00   |
| RhH                             | $Fm\bar{3}m$ | 4.043            | 4.043            | 4.043            | 90.00    | 90.00   | 90.00    |
| BaO                             | $Fm\bar{3}m$ | 5.601            | 5.601            | 5.601            | 90.00    | 90.00   | 90.00    |
| BeO                             | $P6_3mc$     | 2.702            | 2.702            | 4.389            | 90.00    | 90.00   | 120.00   |
| MgO                             | $Fm\bar{3}m$ | 4.248            | 4.248            | 4.248            | 90.00    | 90.00   | 90.00    |
| LiF                             | $Fm\bar{3}m$ | 4.072            | 4.072            | 4.072            | 90.00    | 90.00   | 90.00    |
| LiCl                            | $Fm\bar{3}m$ | 3.643            | 3.643            | 3.643            | 60.00    | 60.00   | 60.00    |
| LiI                             | $P6_3mc$     | 4.261            | 4.261            | 4.261            | 60.00    | 60.00   | 60.00    |
| NaF                             | $Fm\bar{3}m$ | 3.321            | 3.321            | 3.321            | 90.00    | 90.00   | 90.00    |
| NaCl                            | $Fm\bar{3}m$ | 5.696            | 5.696            | 5.696            | 90.00    | 90.00   | 90.00    |
| NaI                             | $Fm\bar{3}m$ | 6.532            | 6.532            | 6.532            | 90.00    | 90.00   | 90.00    |
| CsF                             | $Fm\bar{3}m$ | 4.326            | 4.326            | 4.326            | 60.00    | 60.00   | 60.00    |
| CsCl                            | $Fm\bar{3}m$ | 7.087            | 7.087            | 7.087            | 90.00    | 90.00   | 90.00    |
| CsI                             | $Fm\bar{3}m$ | 5.557            | 5.557            | 5.557            | 60.00    | 60.00   | 60.00    |
| BeF <sub>2</sub>                | $I\bar{4}3m$ | 8.561            | 8.561            | 8.561            | 90.00    | 90.00   | 90.00    |
| BeCl <sub>2</sub>               | $Ibam$       | 5.247            | 5.738            | 6.586            | 115.82   | 113.47  | 90.00    |
| BeI <sub>2</sub>                | $Ibam$       | 6.505            | 6.143            | 7.554            | 113.99   | 115.50  | 90.00    |
| MgF <sub>2</sub>                | $Ibam$       | 3.094            | 4.686            | 4.703            | 90.00    | 90.00   | 90.00    |
| MgCl <sub>2</sub>               | $R\bar{3}m$  | 6.908            | 6.908            | 6.908            | 30.86    | 30.86   | 30.86    |
| MgI <sub>2</sub>                | $P\bar{3}m1$ | 4.210            | 4.210            | 7.731            | 90.00    | 90.00   | 120.00   |

|                              |                                |       |        |        |       |       |        |
|------------------------------|--------------------------------|-------|--------|--------|-------|-------|--------|
| BaF <sub>2</sub>             | <i>Fm<math>\bar{3}</math>m</i> | 4.442 | 4.442  | 4.442  | 60.00 | 60.00 | 60.00  |
| BaCl <sub>2</sub>            | <i>Fm<math>\bar{3}</math>m</i> | 5.242 | 5.242  | 5.242  | 60.00 | 60.00 | 60.00  |
| BaI <sub>2</sub>             | <i>Pnma</i>                    | 5.418 | 10.848 | 18.051 | 90.16 | 90.00 | 90.00  |
| KBr                          | <i>Fm<math>\bar{3}</math>m</i> | 4.749 | 4.749  | 4.749  | 60.00 | 60.00 | 60.00  |
| SiC                          | <i>P6<sub>3</sub>mc</i>        | 3.093 | 3.093  | 15.178 | 90.00 | 90.00 | 120.00 |
| SiO <sub>2</sub><br>(quartz) | <i>I<math>\bar{4}</math>2d</i> | 5.036 | 5.036  | 7.371  | 90.00 | 90.00 | 90.00  |
| TiO <sub>2</sub>             | <i>C<sub>2</sub><br/>c</i>     | 3.803 | 3.803  | 9.734  | 90.00 | 90.00 | 90.00  |
| ZnS<br>(sphalerite)          | <i>F<math>\bar{4}</math>3m</i> | 5.431 | 5.431  | 5.431  | 90.00 | 90.00 | 90.00  |

**Supplementary Table 5.** Bader charges and degrees of ionicity in some molecules determined from experimental dipole moments, from Bader analysis, and calculated using Pauling's and our formulae.

| System | Bader Charges |       | Ionic Character / % |                     |                        |                  |
|--------|---------------|-------|---------------------|---------------------|------------------------|------------------|
|        | Cation        | Anion | From dipole moment  | From Bader analysis | From Pauling's formula | From our formula |
| HF     | 0.72          | -0.72 | 41.33               | 71.62               | 54.71                  | 45.90            |
| HCl    | 0.38          | -0.38 | 17.64               | 37.67               | 20.58                  | 13.16            |
| HBr    | 0.42          | -0.42 | 12.18               | 42.06               | 13.45                  | 10.60            |
| HI     | 0.44          | -0.44 | 5.80                | 43.56               | 5.15                   | 1.69             |
| LiF    | 0.70          | -0.70 | 83.66               | 69.82               | 89.46                  | 89.28            |
| LiCl   | 0.71          | -0.71 | 72.99               | 71.19               | 69.52                  | 69.25            |
| LiBr   | 0.79          | -0.79 | 69.34               | 79.28               | 62.47                  | 66.45            |
| LiI    | 0.84          | -0.84 | 54.68               | 84.14               | 50.62                  | 50.70            |
| NaF    | 0.63          | -0.63 | 87.82               | 62.87               | 90.23                  | 89.79            |
| KCl    | 0.88          | -0.88 | 79.94               | 88.25               | 74.56                  | 74.42            |
| KBr    | 0.90          | -0.90 | 78.26               | 89.98               | 68.17                  | 71.91            |
| KI     | 0.90          | -0.90 | 75.49               | 90.14               | 57.10                  | 57.31            |
| CsF    | 0.73          | -0.73 | 69.87               | 72.82               | 92.15                  | 93.59            |

|      |      |       |       |       |       |       |
|------|------|-------|-------|-------|-------|-------|
| CsCl | 0.80 | -0.80 | 74.51 | 80.23 | 75.44 | 79.00 |
| CsI  | 0.85 | -0.85 | 76.00 | 85.04 | 58.28 | 63.53 |
| ICl  | 0.03 | -0.03 | 11.12 | 3.16  | 6.06  | 5.82  |
| IBr  | 0.10 | -0.10 | 6.22  | 9.82  | 2.22  | 4.08  |

**Supplementary Table 6.** Bader charges and degrees of ionicity of some crystals determined using Bader analysis and calculated using Pauling's and our formulae.

| System                          | Bader Charges |       | Ionic Character / % |                        |                  |
|---------------------------------|---------------|-------|---------------------|------------------------|------------------|
|                                 | Cation        | Anion | From Bader analysis | From Pauling's formula | From our formula |
| AlN                             | 2.37          | -2.37 | 78.93               | 40.02                  | 51.38            |
| Al <sub>2</sub> O <sub>3</sub>  | 2.48          | -1.65 | 82.62               | 56.71                  | 65.30            |
| BaF <sub>2</sub>                | 1.72          | -0.86 | 86.07               | 90.81                  | 92.67            |
| BaCl <sub>2</sub>               | 1.62          | -0.81 | 80.38               | 72.42                  | 76.78            |
| BaI <sub>2</sub>                | 1.55          | -0.78 | 77.71               | 54.31                  | 60.48            |
| BaO                             | 1.56          | -1.56 | 78.18               | 80.32                  | 87.32            |
| BeF <sub>2</sub>                | 1.76          | -0.88 | 87.89               | 76.59                  | 81.07            |
| BeCl <sub>2</sub>               | 1.67          | -0.83 | 83.29               | 46.85                  | 54.05            |
| BeI <sub>2</sub>                | 1.54          | -0.77 | 76.79               | 25.70                  | 33.34            |
| BeO                             | 1.69          | -1.69 | 84.45               | 58.28                  | 70.86            |
| Bi <sub>2</sub> Te <sub>3</sub> | 0.70          | -0.47 | 23.49               | 0.16                   | 12.63            |
| CsF                             | 0.88          | -0.88 | 88.13               | 92.15                  | 93.59            |
| CsCl                            | 0.84          | -0.84 | 84.29               | 75.44                  | 79.00            |

|                           |      |       |       |       |       |
|---------------------------|------|-------|-------|-------|-------|
| CsI                       | 0.81 | -0.81 | 80.69 | 58.28 | 63.53 |
| KBr                       | 0.83 | -0.83 | 82.90 | 68.17 | 71.91 |
| LiH                       | 0.83 | -0.83 | 83.23 | 31.07 | 39.63 |
| LiF                       | 0.87 | -0.87 | 86.82 | 89.46 | 89.28 |
| LiCl                      | 0.89 | -0.89 | 88.51 | 69.52 | 69.25 |
| LiI                       | 0.88 | -0.88 | 88.28 | 50.62 | 50.70 |
| MgF <sub>2</sub>          | 1.67 | -0.84 | 83.53 | 83.17 | 82.24 |
| MgCl <sub>2</sub>         | 1.66 | -0.83 | 82.84 | 57.50 | 56.02 |
| MgI <sub>2</sub>          | 1.58 | -0.79 | 79.19 | 36.59 | 35.43 |
| MgO                       | 1.64 | -1.64 | 82.19 | 67.83 | 72.42 |
| NaF                       | 0.82 | -0.82 | 82.43 | 90.23 | 89.79 |
| NaCl                      | 0.83 | -0.83 | 82.91 | 71.15 | 70.33 |
| NaI                       | 0.82 | -0.82 | 82.40 | 52.68 | 52.05 |
| PbH                       | 0.37 | -0.37 | 37.40 | 2.69  | 11.09 |
| RhH                       | 0.10 | -0.10 | 9.61  | 0.16  | 9.64  |
| SiC                       | 2.64 | -2.64 | 66.10 | 10.02 | 7.00  |
| SiO <sub>2</sub> (quartz) | 3.22 | -1.61 | 80.45 | 44.73 | 45.90 |

|                     |      |       |       |       |       |
|---------------------|------|-------|-------|-------|-------|
| TiO <sub>2</sub>    | 1.98 | -0.99 | 49.54 | 59.44 | 79.84 |
| ZnS<br>(sphalerite) | 0.88 | -0.88 | 43.97 | 19.44 | 60.48 |



**Supplementary Figure 7** Correlation between different electronegativities with work function<sup>[7]</sup> of pure elements. *Legend:* metals, empty circles; non-metals, full squares.

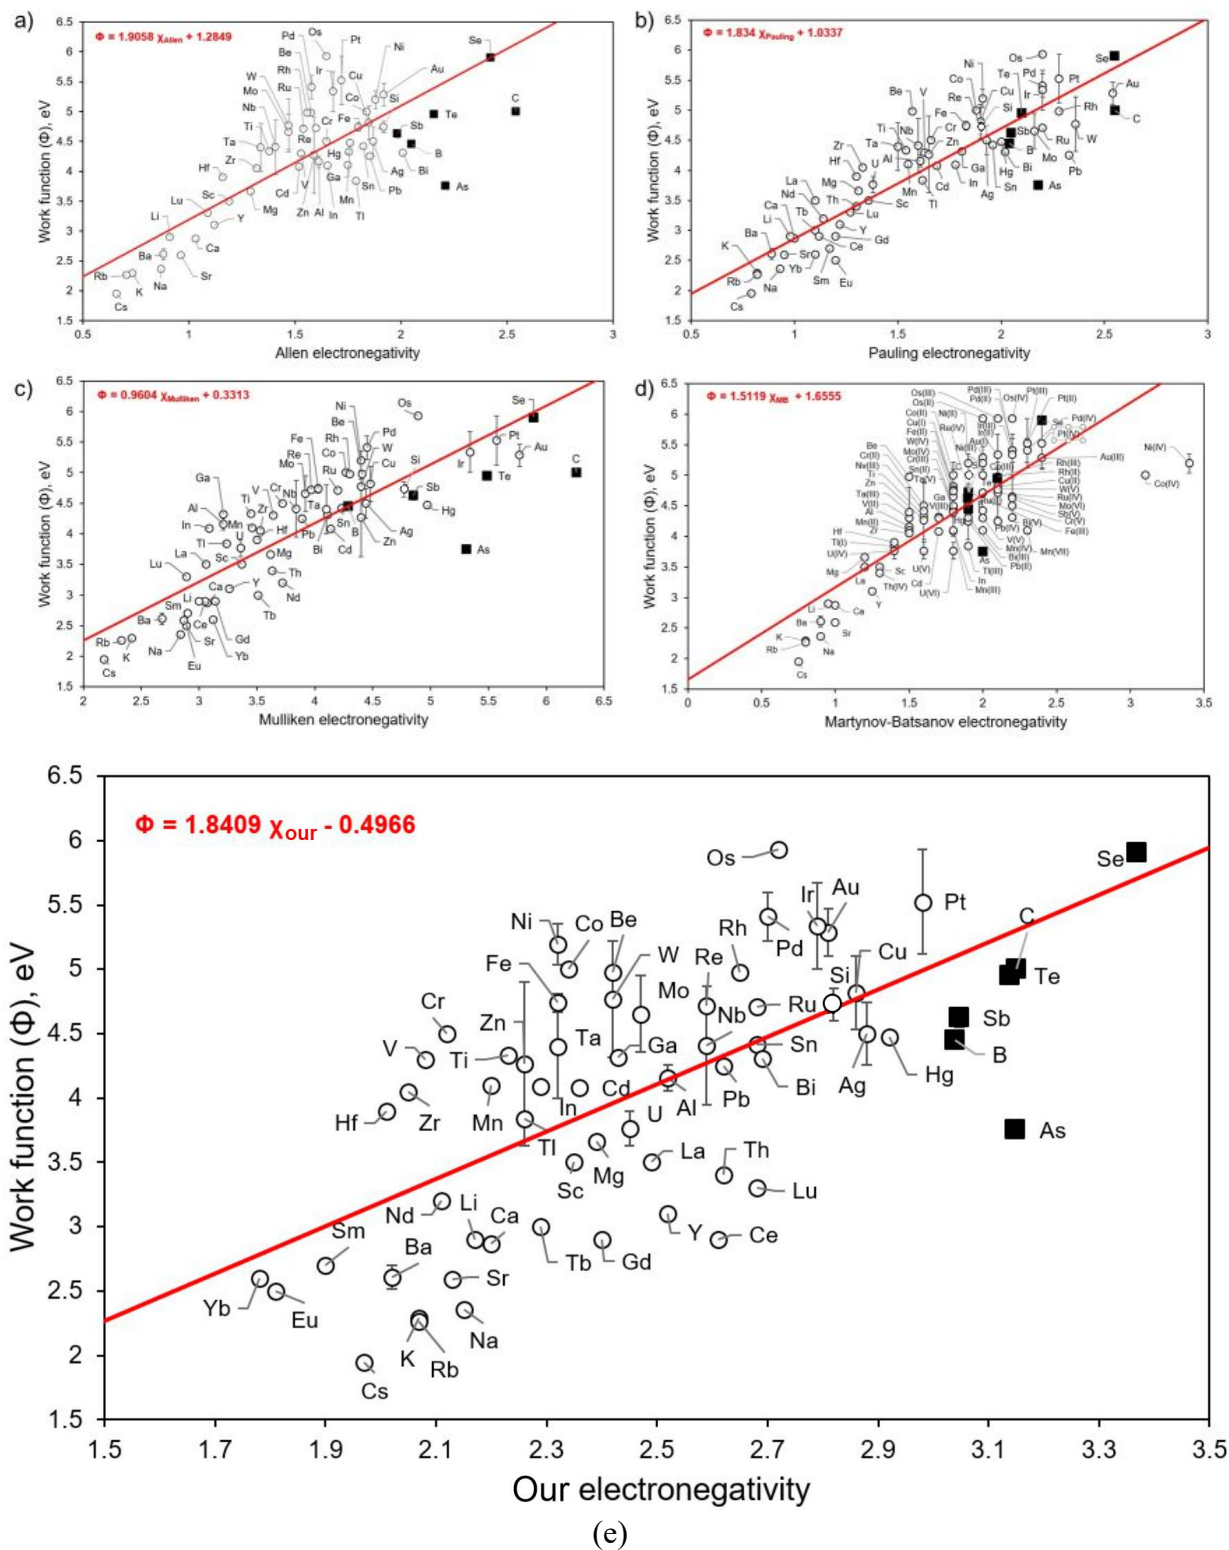

Supplement: 41467_2021_22429_MOESM1_ESM.pdf [file 41467_2021_22429_MOESM1_ESM.pdf]
